# Supplementary material for: NGF-Induced Cell Differentiation and Gene Activation Is Mediated by Integrative Nuclear FGFR1 Signaling (INFS)
Source: PLoS One. 2013 Jul 10;8(7):e68931. doi: 10.1371/journal.pone.0068931 (PMC3707895; doi:10.1371/journal.pone.0068931)
Supplement: Table S2 — Primers used for Chromatin Immunoprecipitation (ChIP). (DOCX) [file pone.0068931.s007.docx]

| **Gene** | **Site** | **Primers** | **Products (bp)** |
| --- | --- | --- | --- |
| TH | NBRE | | 5’- AGCTCATAAGAGCTTTCAGATTATC | | --- | | 5’- CTGAGACAGGGTGGATCCCAG | | 205 |
| TH | NurRE-like site | | 5’- AGGTTATAGTTCTAACATGAG | | --- | | 5’- GCCTCCGTCCCATTAGATCTAATTG | | 200 |
| DCX | NBRE | | 5’-GCTCAGGACTTTGCATCCACCACTG | | --- | | 5’- TGGCCTGAATACATAGCAGTGG | | 219 |
| DCX | NurRE-DR2 site | | 5’- GAGGATCAATTAAGGAATAATAC | | --- | | 5’- ATGTTGCACAGTACATTCCTGTGAG | | 253 |
| FGF2 | NBRE | | 5’-TCTACCCTCACTCACAGTGGAGTG | | --- | | 5’- ACTCCAAGAACTGACTGAGTTG | | 192 |
| FGF2 | NurRE-DR2 site | | 5’- CTGAGAGAAGGTGTTCCGGGATC | | --- | | 5’- CATTAATATGTACAGCTCTTATAT | | 210 |
| Nur77 | NurRE-like site | | 5’- AGTCCTGTTGCAAGCTGTGCT | | --- | | 5’- TCAGGTGGCTCACAACCATCTG | | 233 |
| Nurr1 | NurRE-like site | | 5’- CATCCTGATTGAATAATCTTATCAT | | --- | | 5’- CATTTACCAGAAGAAAATTGATAGC | | 184 |
| BIII-Tubulin | NBRE-like site | | 5’- GTACTTGTCGGGTATTGTGCATC | | --- | | 5’- TGCTGAGTCGCTTGAGGTGGGAG | | 204 |
| BIII-Tubulin | NurRE-like site | | 5’- GATCTGTTTGGACTGTTCTTAGG | | --- | | 5’- TGTTGTTGTCATGTGGACATTAGC | | 324 |
| Cyclophilin A |  | | 5' - AACTTTCGTGCTCTGAGC | | --- | | 5' - ATGGCGTGTGAAGTCACC | | 907 |

**Table S2. Primers used for Chromatin Immunoprecipitation (ChIP).**
